# Supplementary material for: How does initial soil moisture influence the hydrological response? A case study from southern France
Source: Copernicus journal article supplement (doi:10.5194/hess-22-6127-2018), 2018-11-29
Supplement: Supplementary file [file hess-22-6127-2018-supplement-title-page.pdf › hess-22-6127-2018-supplement-title-page.pdf]

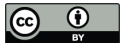

## *Supplement of*

# **How does initial soil moisture influence the hydrological response? A case study from southern France**

**Magdalena Uber et al.**

*Correspondence to:* Magdalena Uber ([magdalena.uber@univ-grenoble-alpes.fr](mailto:magdalena.uber@univ-grenoble-alpes.fr))

- [hess-22-6127-2018-supplement-title-page.pdf](#)
- [Supplementary\\_Material](#)
  - [S1\\_Gazel\\_On\\_alert\\_soil\\_moisture\\_2012-2015.dat](#)
  - [S2\\_Pictures\\_Overland\\_Flow\\_Claduegne\\_23\\_10\\_2013.pdf](#)

The copyright of individual parts of the supplement might differ from the CC BY 4.0 License.
